# Supplementary material
Source: PubMed Central journal article supplement (PMC6885734)
Supplement: EMBJ-38-e101982-s001.pdf [file EMBJ-38-e101982-s001.pdf]

## **Victorelli *et al.* Appendix**

### **Table of Contents**

|                                                                                                                                      |   |
|--------------------------------------------------------------------------------------------------------------------------------------|---|
| <b>Appendix Figure S1</b> - Association between TAF in melanocytes and surrounding keratinocytes <i>in vivo</i> ....                 | 1 |
| <b>Appendix Figure S2</b> - X-ray irradiation induces senescence in human epidermal melanocytes <i>in vitro</i> . ....               | 2 |
| <b>Appendix Figure S3</b> - Senescent melanocytes impair keratinocyte differentiation in 3D epidermal equivalents. ....              | 3 |
| <b>Appendix Figure S4</b> - IP-10 triggers increased mitochondrial ROS production. ....                                              | 4 |
| <b>Appendix Figure S5</b> - Clearance of senescent melanocytes rescues the number of keratinocytes in 3D epidermal equivalents. .... | 5 |

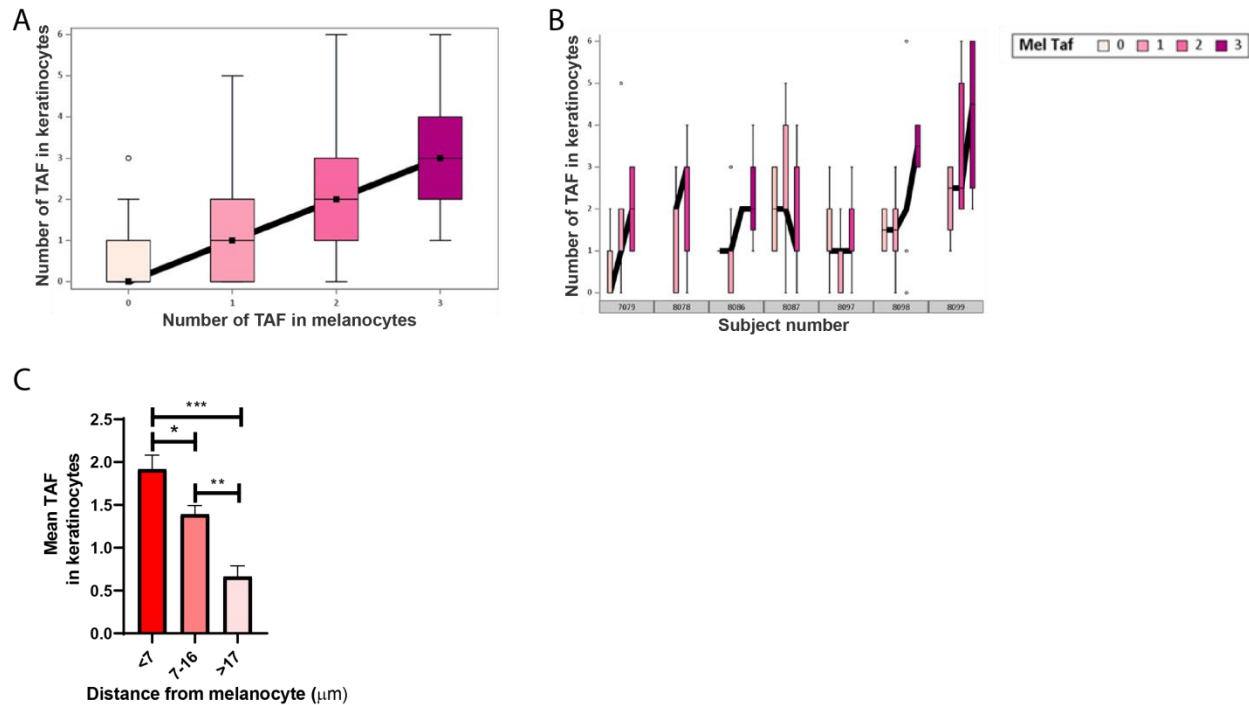

**Appendix Figure S1 - Association between TAF in melanocytes and surrounding keratinocytes *in vivo*.** **(A)** Association between number of TAF in melanocytes (X-axis) and surrounding keratinocytes (Y-axis). There were a total of 369 keratinocytes that had a TAF count in association with a melanocyte TAF count in 14 subjects. There is a positive trend in the medians of  $\rho=0.45$  with a p-value  $<0.0001$ . **(B)** For the old group, 6/7 subjects had a positive correlation between damage in melanocytes and keratinocytes of which 3/6 are significant at a p-value  $<0.05$ . A similar pattern was not observed in young subjects (data not shown) but this was unsurprising given the lower amount of TAF damage seen (e.g. 2 or more TAF counts in melanocytes made up nearly 20% of total counts in old but  $<5\%$  in young). **(C)** Mean number of TAF in keratinocytes surrounding melanocytes with 1 – 3 TAF within the distances indicated. Data are mean  $\pm$  SEM (n=7 old donors). 70 – 100 keratinocytes were analyzed per donor.

\*p $<0.05$ , \*\*p $<0.01$ , \*\*\*p $<0.001$

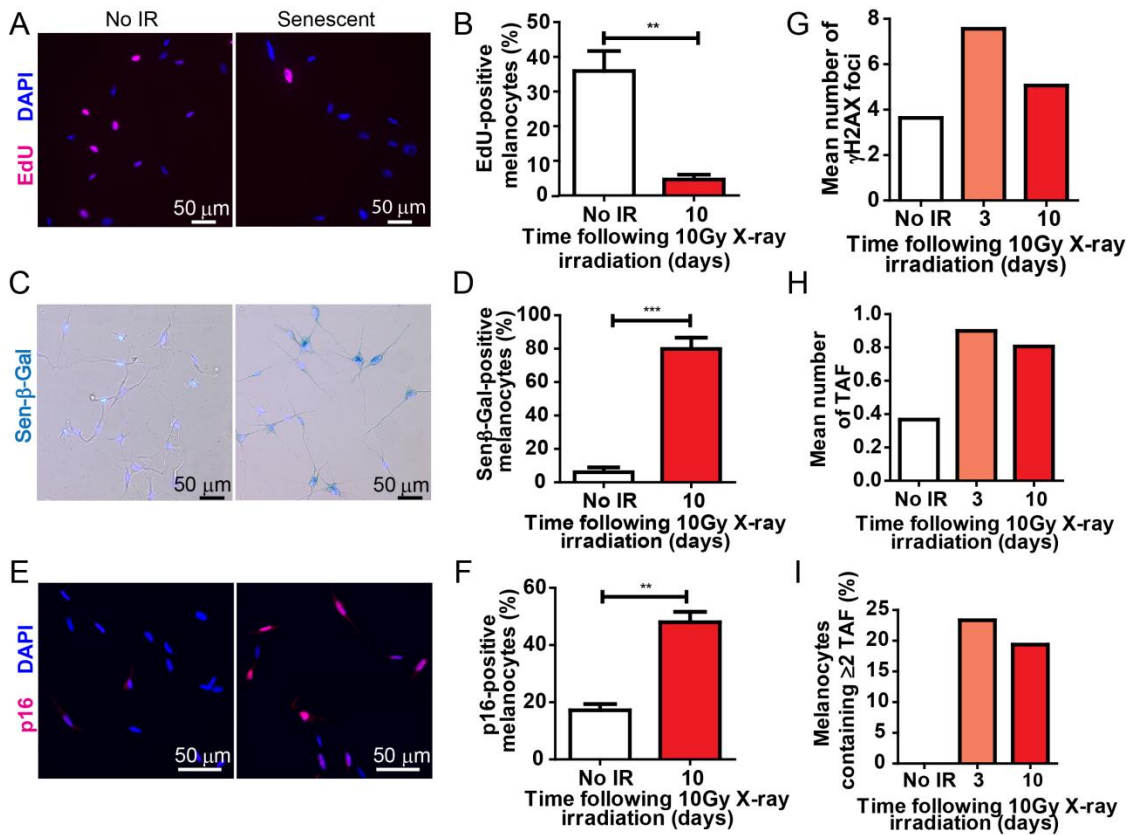

**Appendix Figure S2 - X-ray irradiation induces senescence in human epidermal melanocytes *in vitro*.** (A) Representative immunofluorescence images of EdU staining of non-irradiated melanocytes and cells 10 days after X-ray irradiation (red: EdU; blue: DAPI). Images were taken using a 20x objective. (B) Percentage of EdU-positive melanocytes at control, proliferating conditions (No IR) and 10 days after 10 Gy X-ray irradiation. Data are mean  $\pm$  S.E.M. of N=3 independent experiments. (C) Representative Sen-β-Gal (blue) images of non-irradiated melanocytes and cells 10 days following X-ray irradiation. Images were taken using a 20x objective. (D) Percentage of Sen-β-Gal-positive untreated and irradiated melanocytes. Data are mean  $\pm$  S.E.M. of N=3 independent experiments. (E) Representative p16 immunofluorescence images of non-irradiated and senescent (10d 10Gy) melanocytes (Red: p16; blue: DAPI). Images were taken using a 40x objective. (F) Percentage of p16-positive untreated and irradiated melanocytes 10 days after the initial exposure. Data are mean  $\pm$  S.E.M. of N=3 independent experiments. Graphs showing (G) mean number of γH2AX foci, (H) mean number of TAF, and (I) percentage of melanocytes containing  $\geq 2$  TAF. Data are mean of 30 cells obtained from a minimum of 10 random planes (n=1).

\*\*p<0.01, \*\*\*p<0.001

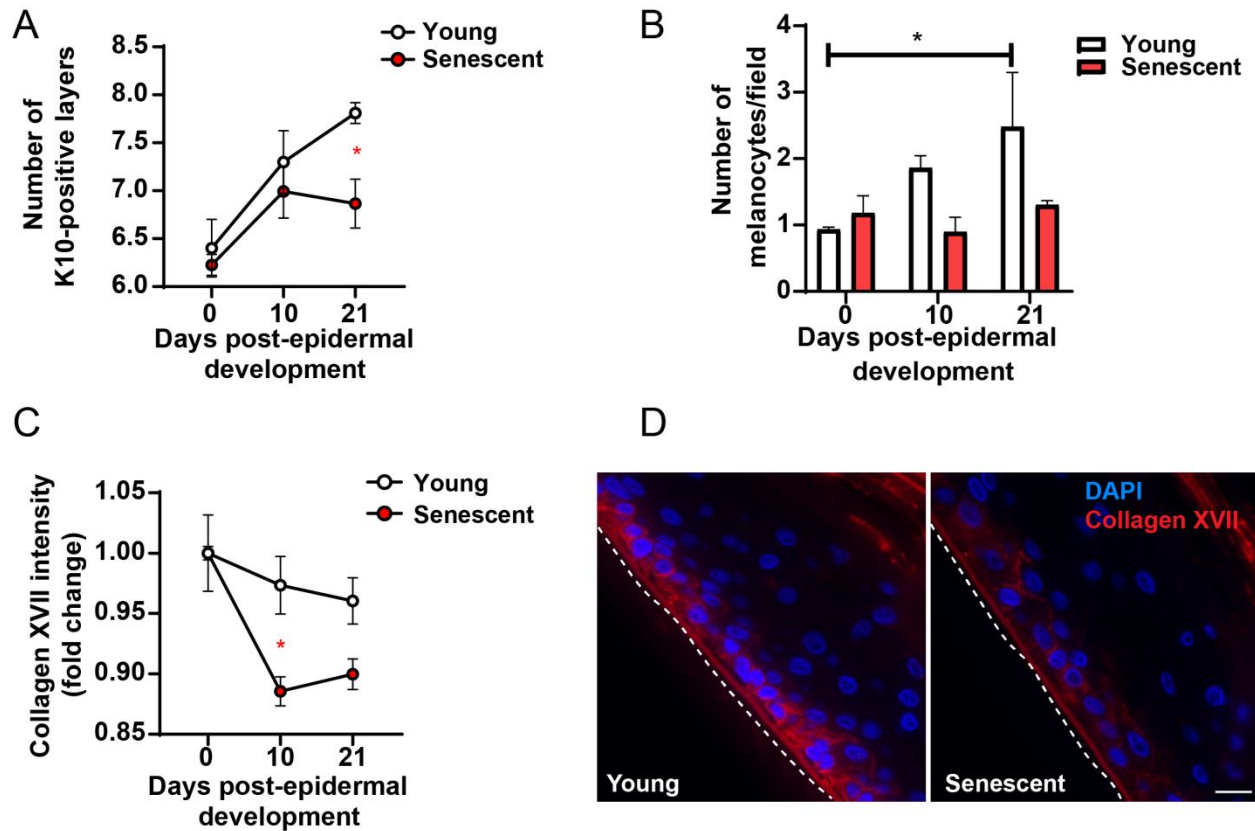

**Appendix Figure S3 - Senescent melanocytes impair keratinocyte differentiation in 3D epidermal equivalents.** **(A)** Number of cell layers positive for keratin 10 in melanoderms containing either young or senescent melanocytes at the time points indicated. Data are mean  $\pm$  SEM of  $n=3$  melanoderms per group. **(B)** Number of young or senescent melanocytes in melanoderms at the time points indicated. Data are mean  $\pm$  SEM of  $n=3$  melanoderms for each condition. **(C)** Collagen XVII intensity in keratinocytes in melanoderms containing either young or senescent melanocytes. Values are fold change normalised to day 0 for each group. Data are mean  $\pm$  SEM of  $n=3$  melanoderms per group. **(D)** Representative immunofluorescence images of collagen VXII in melanoderms containing young or senescent melanocytes. Images were taken using a 20x objective. Scale is 30µm.

\* $P < 0.05$

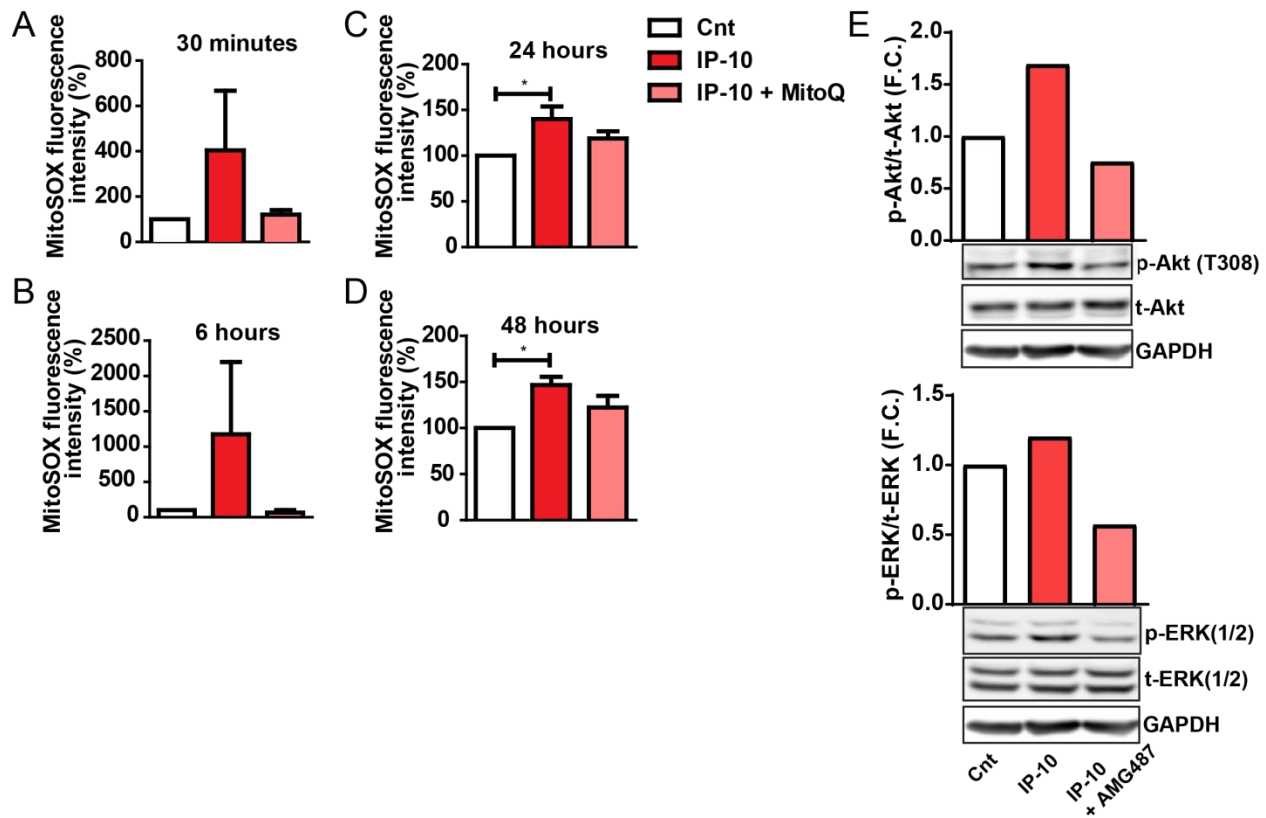

**Appendix Figure S4 - IP-10 triggers increased mitochondrial ROS production.** Graphs showing MitoSOX fluorescence intensity of fibroblasts treated with IP-10 with or without MitoQ for **(A)** 30 minutes, **(B)** 6 hours, **(C)** 24 hours and **(D)** 48 hours. Values are a percentage fold change normalised to controls (untreated). Data are mean  $\pm$  S.E.M. of N=3 independent experiments. \* $p < 0.05$ . **(E)** Representative Western blot showing expression of p-Akt (T308), t-Akt, p-ERK(1/2), t-ERK(1/2), and GAPDH as a loading control in dermal fibroblasts treated with IP-10 with or without AMG487 for 1 hour. Graphs show quantification of the respective Western blots.

\* $P < 0.05$

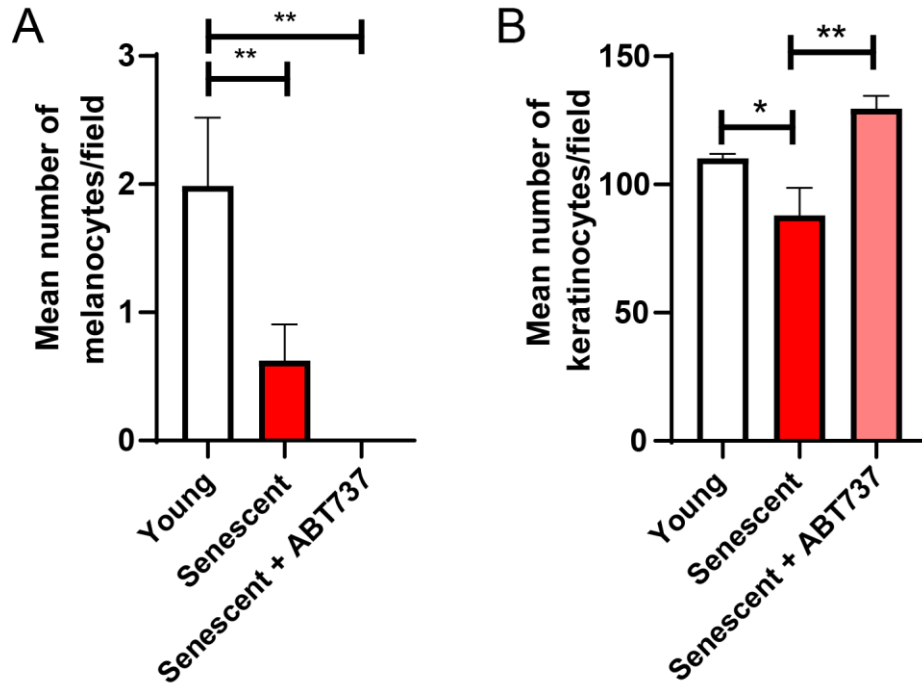

**Appendix Figure S5 - Clearance of senescent melanocytes rescues the number of keratinocytes in 3D epidermal equivalents.** (A) Mean number of melanocytes in melanoderms in the conditions indicated. Data are mean  $\pm$  SEM of  $n=3$  melanoderms per group. (B) Mean number of keratinocytes in melanoderms in the conditions indicated. Data are mean  $\pm$  SEM of  $n=3$  melanoderms per group.

\* $P<0.05$ , \*\* $P<0.01$
