# Supplementary material
Source: PubMed Central journal article supplement (PMC6885734)
Supplement: EMBJ-38-e101982-s002.pdf [file EMBJ-38-e101982-s002.pdf]

## Expanded View Figures

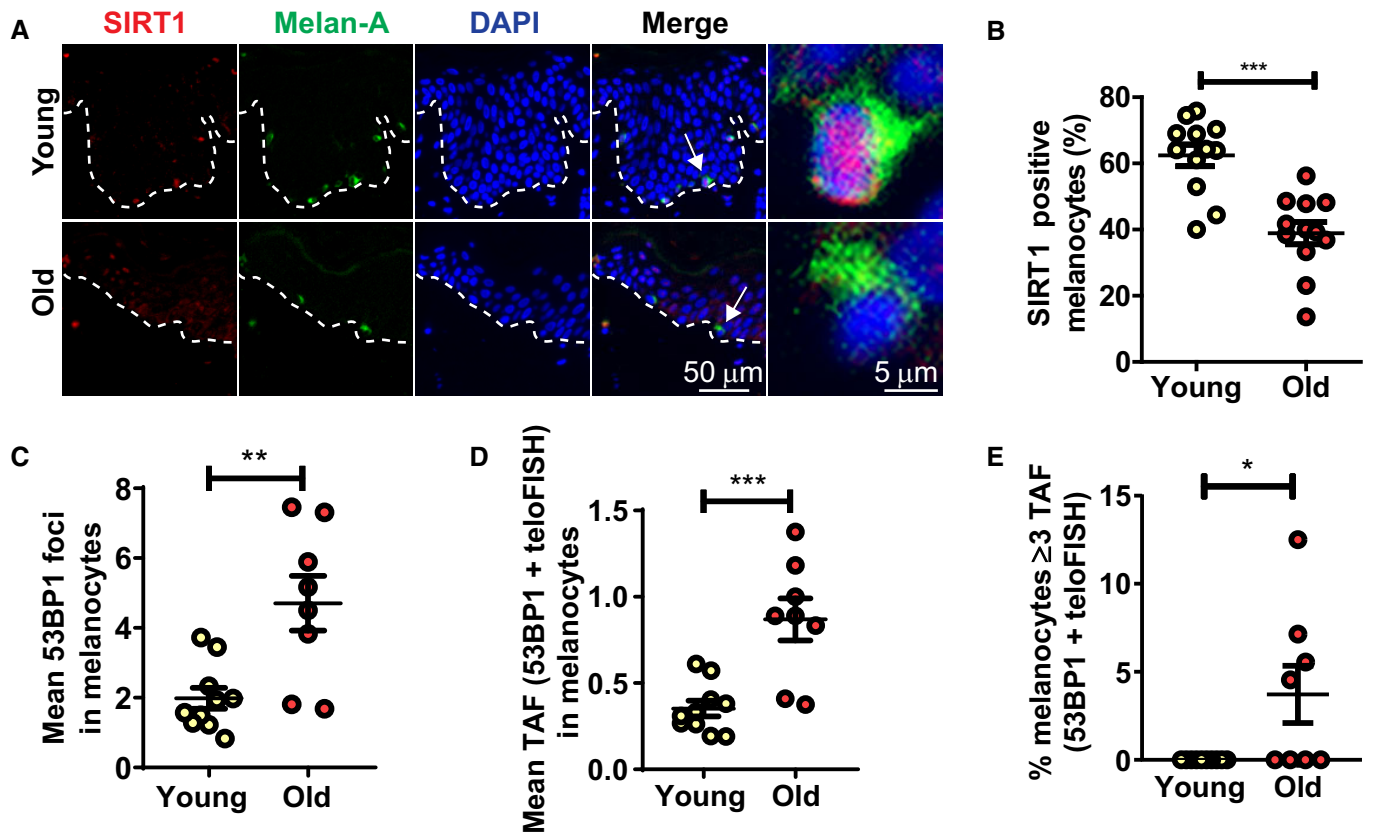

**Figure EV1. Melanocytes express increased markers of senescence in human skin with age.**

**A** Representative images of SIRT1 immunofluorescence in combination with the melanocyte marker Melan-A in young and older skin. Arrow indicates a melanocyte, which is amplified on the right.

**B** Dot plot showing percentage of SIRT1-positive melanocytes for each individual donor. The horizontal line represents the group mean ( $n = 12$  donors for each group). Data are shown as mean  $\pm$  SEM.

**C–E** Graphs showing (C) mean number of 53BP1 foci in melanocytes, (D) mean number of 53BP1 foci co-localising with telomeres in melanocytes and (E) percentage of melanocytes containing  $\geq 3$  53BP1 foci co-localising with telomeres for each individual subject. The horizontal line represents the mean for each group ( $n = 10$  young donors;  $n = 8$  old donors). Data are shown as mean  $\pm$  SEM.

Data information: \* $P < 0.05$ , \*\* $P < 0.01$ , \*\*\* $P < 0.001$ . Statistical tests: two-tailed unpaired  $t$ -test.

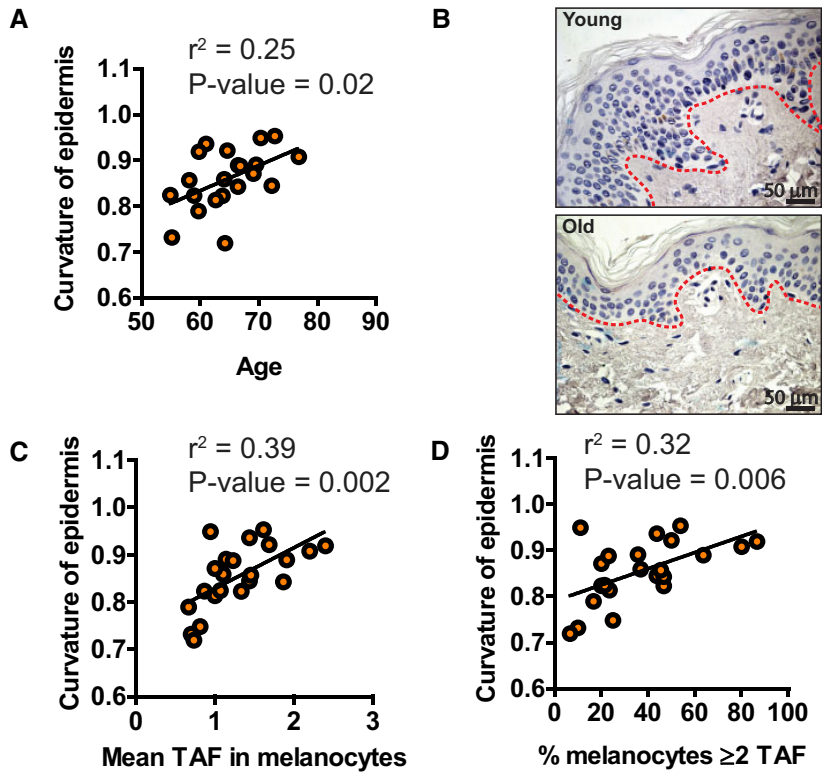

**Figure EV2. Telomere dysfunction in melanocytes correlates with age-associated loss of epidermal curvature.**

- A Graph showing the correlation between epidermal curvature and age for each individual donor ( $n = 22$  donors) accounting for subject age. A curvature value closer to 1 denotes a flatter epidermal–dermal junction (EDJ).
- B Images illustrating the loss in epidermal curvature (red dotted lines) with age. Red dotted lines represent the EDJ.
- C, D Graphs showing correlations between (C) mean number of TAF in melanocytes and (D) percentage of melanocytes containing  $\geq 2$  TAF and epidermal curvature for each individual donor. When accounting for subject age, the statistical significance for these correlations was (C)  $P = 0.007$  and (D)  $P = 0.02$ .

Data information: Correlations were determined using Pearson's correlation test.

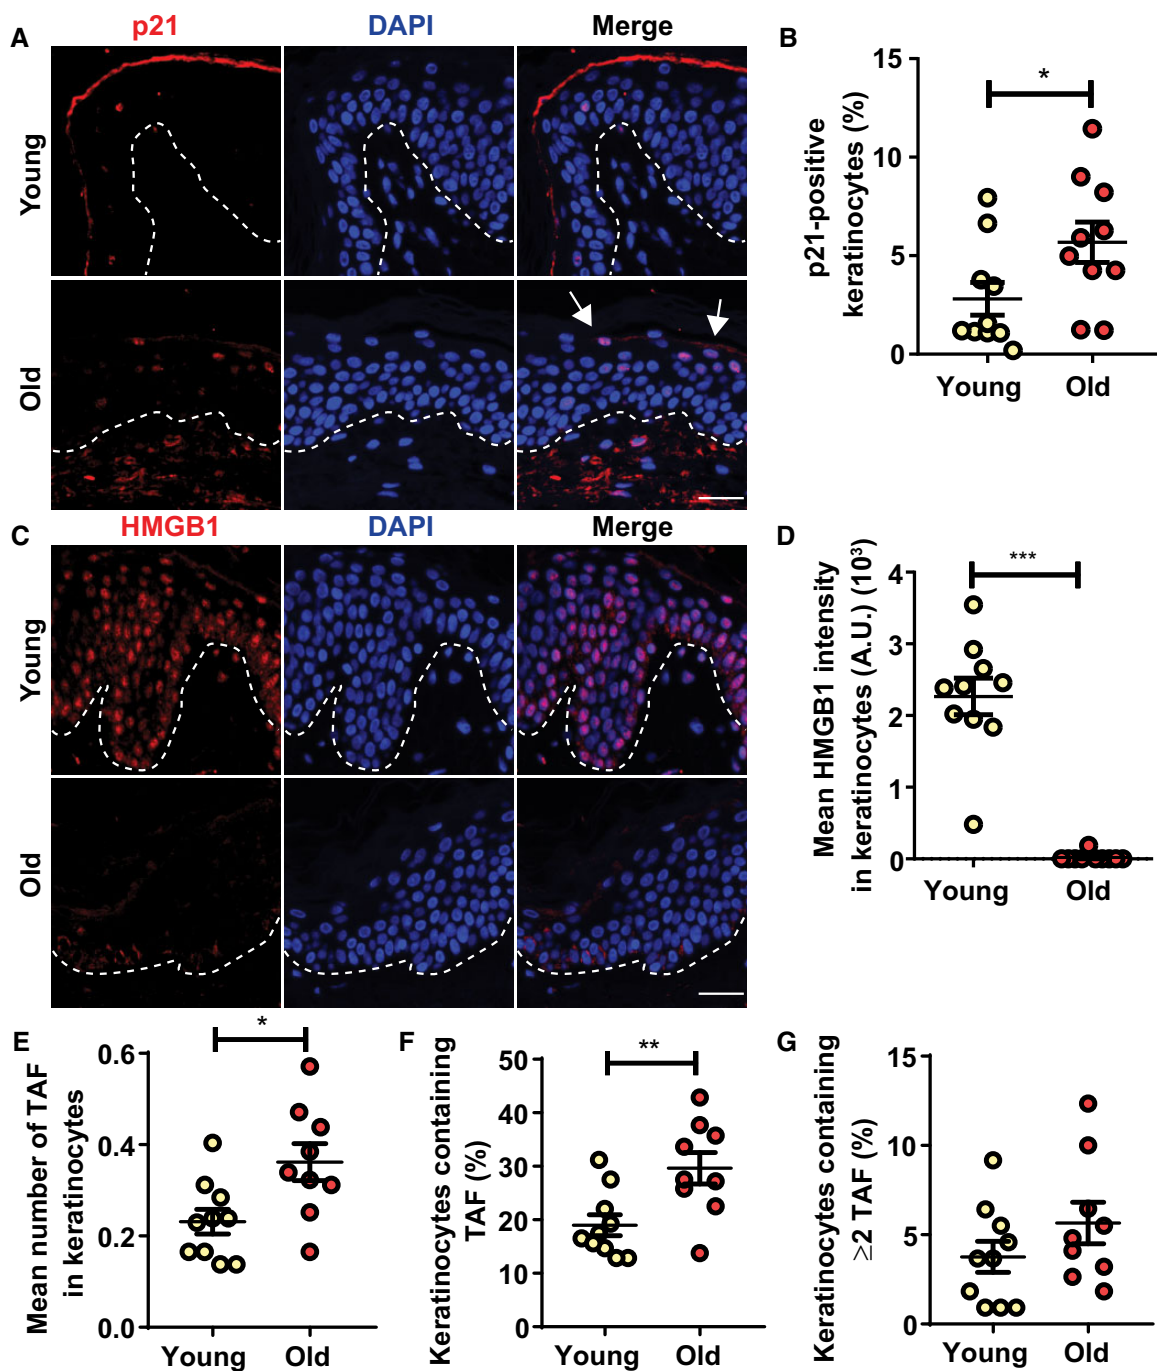

**Figure EV3. Keratinocytes express senescence markers in human skin with age.**

A–D Representative immunofluorescence images of (A) p21 and (C) HMGB1 in skin from young and old donors. Images were taken using a 20× objective. Arrows indicate p21-positive keratinocytes in the uppermost layer of the epidermis. Scale is 30 μm. Graphs showing (B) percentage of p21-positive keratinocytes per donor and (D) HMGB1 intensity in keratinocytes. The horizontal line represents the mean for each group (n = 10 donors per group). Data are shown as mean ± SEM.

E–G (E) Mean number of TAF in keratinocytes, (F) percentage of keratinocytes containing TAF and (G) percentage of keratinocytes containing ≥ 2 TAF in skin sections from young and old donors. The mean for each group is represented by the horizontal line (n = 10 young donors; n = 9 old donors). Data are shown as ± SEM.

Data information: \*P < 0.05, \*\*P < 0.01, \*\*\*P < 0.001. Statistical tests: two-tailed unpaired t-test.

**Figure EV4. Repeated UVA+B exposure induces senescence in human epidermal melanocytes *in vitro*. Melanocytes were exposed to 0.4 J/cm<sup>2</sup> UVA and UVB radiation once a day for five consecutive days. Cells were harvested 4 and 18 days following the last exposure.**

- A Representative EdU immunofluorescence images of proliferating and irradiated melanocytes (18 days post-IR) (red: EdU; blue: DAPI). Images were taken using a 20× objective.
- B Graph showing the percentage of EdU-positive melanocytes at the time points indicated. Data are shown as mean ± SEM of  $n = 3$  independent experiments.
- C Representative images of Sen-β-Gal (blue) of proliferating and UV-irradiated melanocytes. Images were taken using a 20× objective.
- D Graph showing the percentage of control and irradiated (4 days after the last exposure) Sen-β-Gal-positive melanocytes. Data are shown as mean ± SEM of  $n = 3$  independent experiments.
- E Representative p16 immunofluorescence images of proliferating and senescent melanocytes (18 days following the last UV exposure). Images were taken using a 20× objective.
- F Graph showing the percentage of p16-positive melanocytes at the time points indicated following the last UV exposure. Data are shown as mean ± SEM of  $n = 3$  independent experiments.
- G Representative immuno-FISH images of proliferating (top) and senescent (bottom) melanocytes. Telomeres are shown in red, γH2AX is depicted in green, and DAPI is shown in blue. Arrows indicate co-localisation between γH2AX and telomeres, which are amplified on the right. Images are Z projections and were taken using a 63× oil objective.
- H–J Graphs showing (H) mean number of γH2AX foci, (I) mean number of TAF, (J) percentage of melanocytes containing ≥ 2 TAF. Data are shown as mean ± SEM of  $n = 3$  independent experiments.

Data information: \* $P < 0.05$ , \*\* $P < 0.01$ , \*\*\* $P < 0.001$ . Statistical tests: two-way ANOVA (B, F), one-way ANOVA (D, H–J).

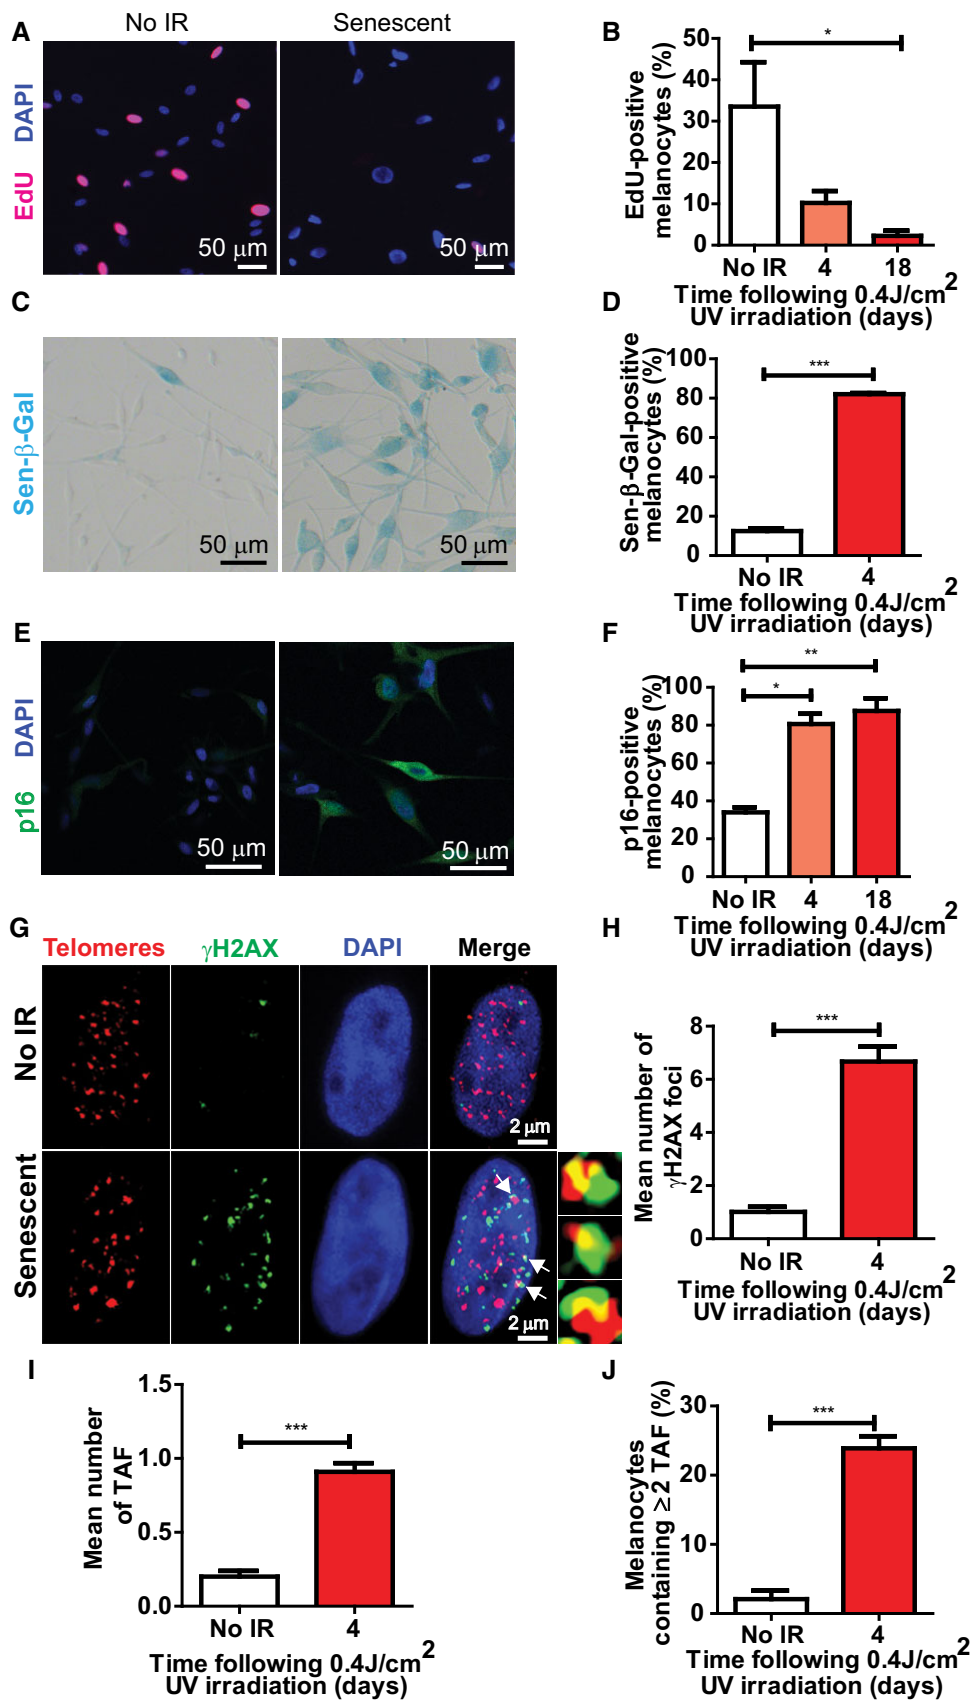

Figure EV4.

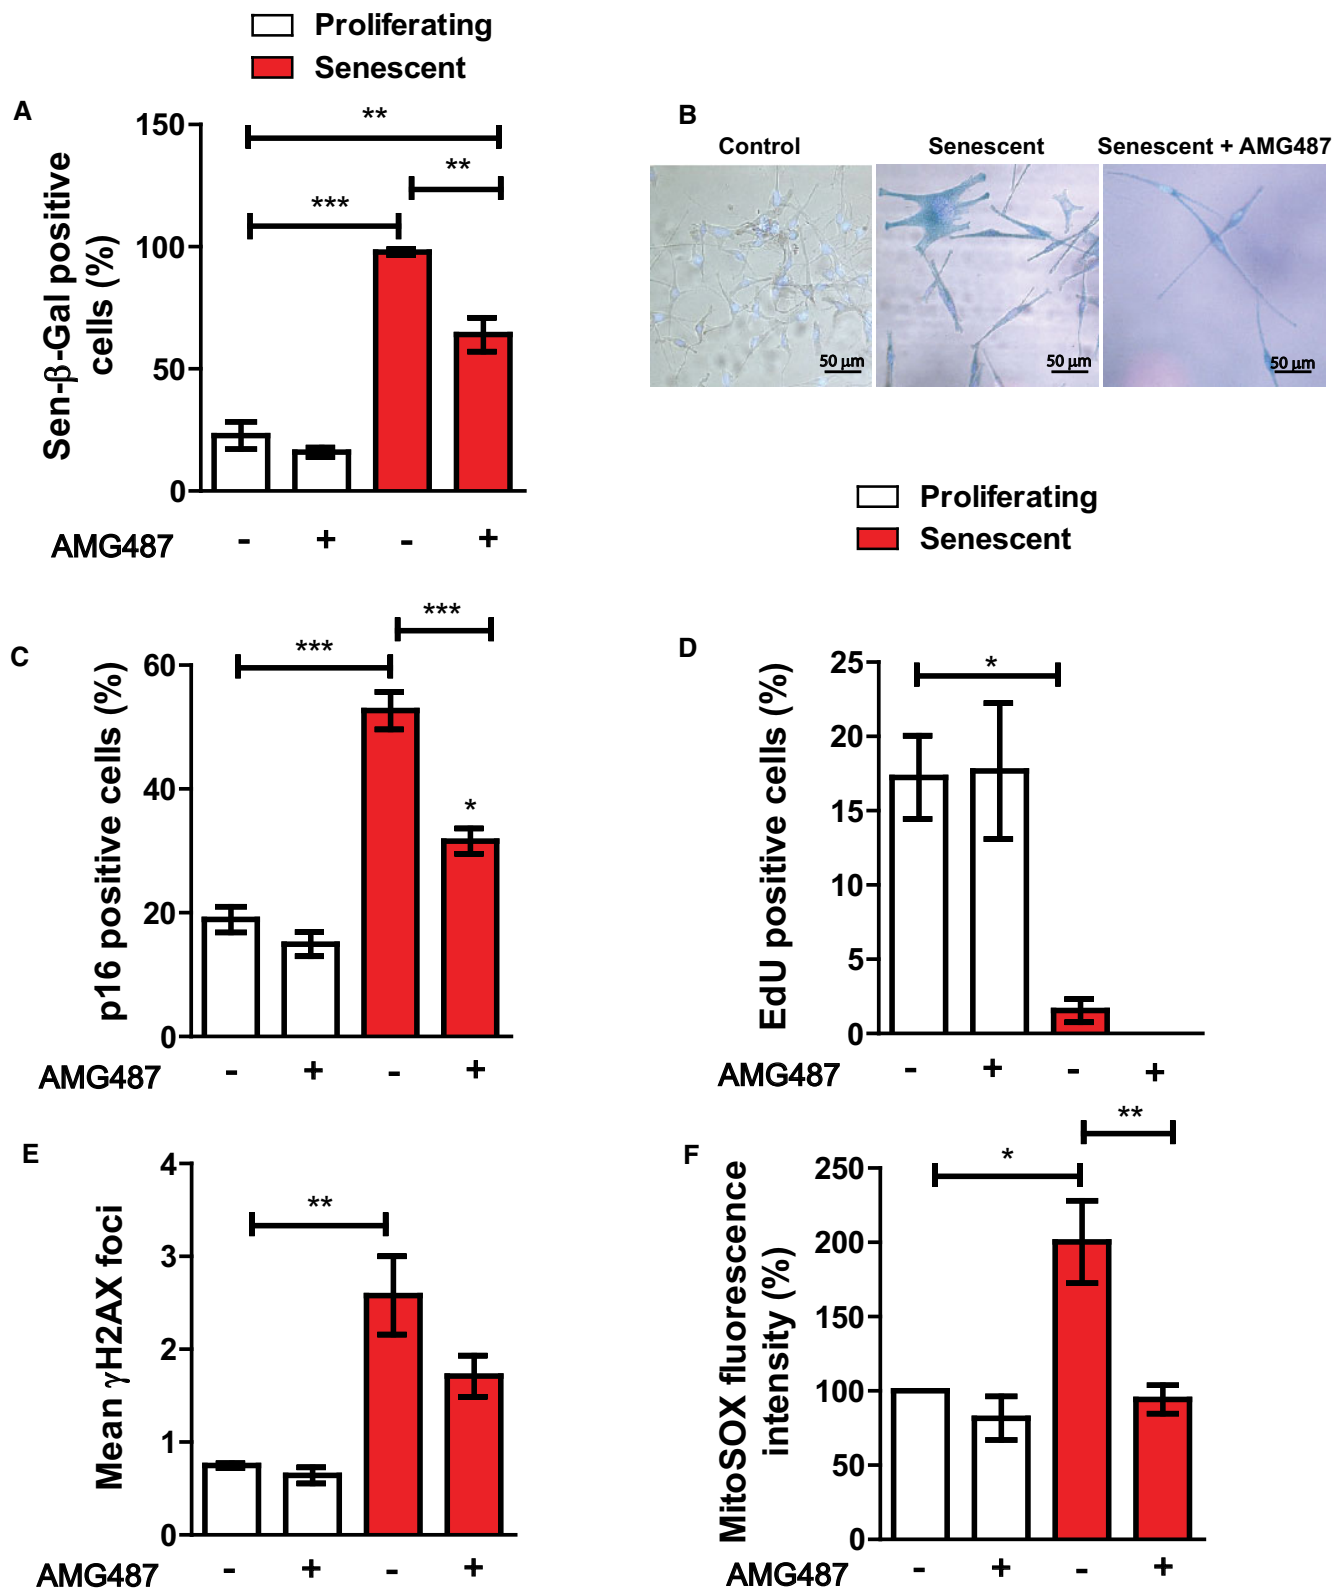

Figure EV5.

◀ **Figure EV5. CXCR3 signalling is involved in the initiation of melanocyte senescence. Senescence was induced in melanocytes by 10 Gy X-ray irradiation, and cells were treated with either AMG487 or vehicle DMSO (control) for 10 days.**

- A Graph showing the percentage of Sen-β-Gal-positive melanocytes at the conditions indicated (white: proliferating melanocytes; red: senescent melanocytes). Data are shown as  $\pm$  SEM ( $n = 3$  independent experiments).
- B Representative Sen-β-Gal images of proliferating and senescent melanocytes with or without AMG487 treatment. Images were taken using a 20 $\times$  objective.
- C–F Graphs showing the percentage of (C) p16-positive and (D) EdU-positive melanocytes at the conditions indicated. (E) Mean number of  $\gamma$ H2AX foci in proliferating and senescent melanocytes with or without AMG487 treatment. (F) MitoSOX fluorescence intensity of melanocytes at the conditions indicated. Values are a percentage fold change normalised to proliferating controls (untreated). ROS measurements were performed at 3 days following irradiation. Data are shown as mean  $\pm$  SEM of  $N = 3$  independent experiments.

Data information: \* $P < 0.05$ , \*\* $P < 0.01$ , \*\*\* $P < 0.001$ . Statistical tests: one-way ANOVA.
